# Supplementary material
Source: PubMed Central journal article supplement (PMC6010310)

**A**

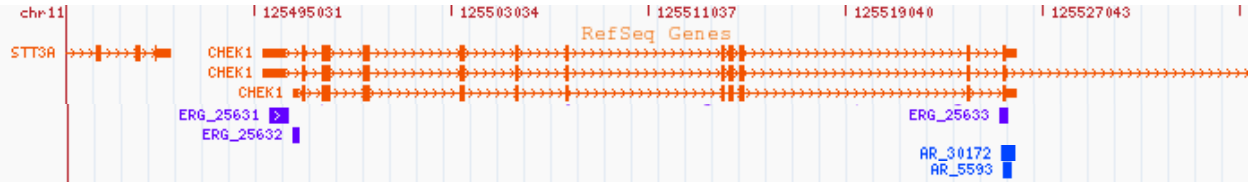

**ERG 25631:** >hg19\_dna range=chr11:125495291-125496040 5'pad=0 3'pad=0 strand== repeatMasking=none  
 CGAAGCCTCTCGCTCCCAACACGGAGTTCTCCATTTCTTACAGTCGGCTCTCAGCAGCTGCTGCTGGTTTCTCGGCTCCAGCACCACGAGTACCGCACTCTGAGGTTTACAAGCACT  
 CTGCTTACCAGACTGTATCCTCACAGTCTGTCCGGTGGCCTCACGAGGTGGCGGTGCAGCCTTTACAGCCAGAGCGCCAGGAGCGAAGCCCGCAGCCCGCCTGGAAAGCGCAG  
 CGCGGTCCGTCGCGCGCCCTGAGGCTTGGAGGCCTGGGCTTCCCCAGCAGCGCTCGAGCACCGCCAGTCGAGCCTCACACCAGGATGCCACTTCATATTTGGGCCAGAGCTCAATT  
 CGCGCGATGCGGTCCGCCCTCTAAATCTCTTACGACGAGATCTCTCCCGACTGCAAAAGCAGCCCTGGGCGGGAGCGCAACATCTCCACGTCAACCTTTTGGAGCCGCCACATTC  
 AGAGGGGCAGGACAGGGAACGCGCGCTGTCTTGTACGGCCGGGTGCGCGAGTTTGGCGGACGCTGACGCCCTCAAGTTTGGCGGGAAAACGCTGCATTTGGATTCTCGAGTG  
 GTGGGCAAAAGACAGTCCCGTGAGGAAGGCCGGCTAGAGTAGGGAAGTTTCTAAAGAAGGAGTTCGGGGCTAGATTAGTAGGAGGAGGCATGGTGGGAAGAAAGTTAGCATTGACT  
 ACGCCAGGGGATTGGAGAGACTCTCGCGGAG

**ERG 25632:** >hg19\_dna range=chr11:125496241-125496465 5'pad=0 3'pad=0 strand== repeatMasking=none  
 TGGGAGGAGCGTGCAGCGGCTTTCTGCCCATACCGCTCCCTATATCTCTTCTCTTCCCGAGACCCCACTCTCCCTCTCTCTCCCGAGTGGTTCGCGGAAAGCATTGG  
 TCTCCACCTCTTCATAACAACAATTAATTTCTCTGGGCGCTGAGGAGGCGAGAATTTCAACCTTCGGTGTCTGGGAGTGCGGATTGTGATTTACACGACA

**B**

1290bp upstream the ATG of CHK1 promoter cloned in pGL2 enhancer

GCACCAGAGTACCGCACTCTGAGTTTTACAAGCACTCTGCTTACCGACTGTGATCCTCACAGTCTGTCCGGTGGCCTCACGAGGTGGCGGTGCAGCCTTTTACAGCCAGAGCGCGG  
 CAGGAGCGAAGCCCGCAGCCCGCCTGGAAGCGCAGCGCGGTGGTCCGCGCGCCCTGAGGCTTGGAGGCCTGGGCTTCCCCAGCAGCGCTCGAGCACCAGCCAGTTCGAGCCTCAC  
 ACCGGATGCCACTTCATATTTGGGCCAGAGCTCAATTCGCGCCGATGCGTCCCGCTCCTTAAATCTCTTACAGCCAGGATCTCTCCCGACTGCAAAAGCAGCCCTGGGCGGGAGCGG  
 CAACATCTCCAGTCAACCTTTTGGAGCCCGCACATTCAGAGGGCAGGACACGGAAACGCGCGCTGTCTTGTTCAGCGCGGGTGCAGGATTTGCGGCAGCGTACGCCCTCAA  
 TTTTGGCGGAAAGCGCTGCATTTGGATTCTCTGAGTGGTGGGCAAGGACAGTCCGGTGAAGAAAGGCGCGGTAGAGTAGGAAAGTTTCAAAGAAGGAGTTCGGGGTCTAGAT  
 TAGTGAGGGAGGCGATGGTGGGAGAAAGTTAGCAATTGACTAGCGCAGGGATTGGAGAGACTCTCGGAGGGCGGTTTCGGAGGGTGGAGGAATGGTACCAGGAGTTCCCGTTGTG  
 GGGCGGGGAGGAGGACTAACCCGCTGTAGCTAAGAACCCCAAGGAGTCCAGCCCTTCTTTCGCTCTGGGGCAGTTTGGCCCCCGCCCGCCTTTGGGACGGTGGG  
 GCTGTGGATGGGATGGAAATGGAAATGGAAATGGAGCAATTTGGGAGGAGGCGCTGCCGAGGCGTTTTCTGCCCATACCGCTCCCTATATCTCTCTTCCCGAGACCCCACTCTCC  
 TCTCTCTCCCGAGTCTGCTGCCGAAAGCATTGTCTCCACCTCTTCATAACAACAATTAATTTCTCTGGGCGCTGAGGAGGCGAGAATTTCAACCTTCGGTGTGCTTGGGAGTGGCG  
 ATTGTGATTTACACGACAAGTGTGCTGAGTGAATAGTTGTCGTTGTTGAAAGACTGGATAAATGTGGATGAGTAGAAGGGAAAGCAAGAGCTGTTAATTTTCGTTGGCAATCTCG  
 GGGGAGCGGGGCGATGGCTTCACTGGTGTCTTACACTTACATCTTTCTGGATTCTGCTTTTACAGCCGAGGTGCTCGGTGGAGTCAAT

**C**

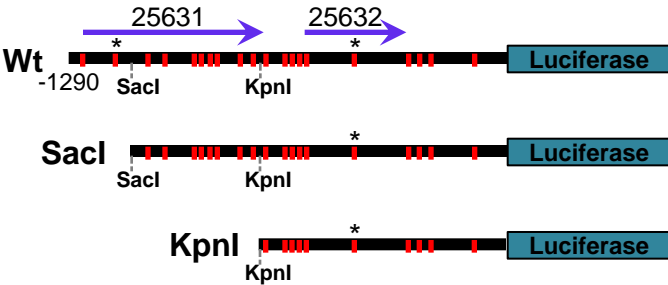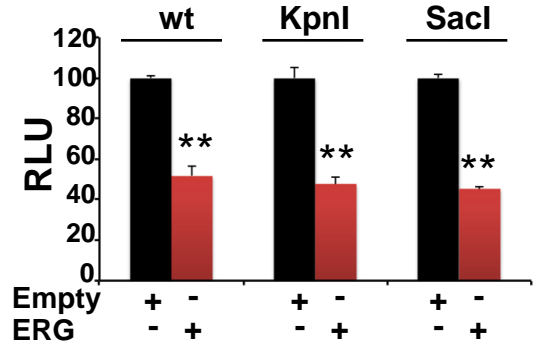

**D**

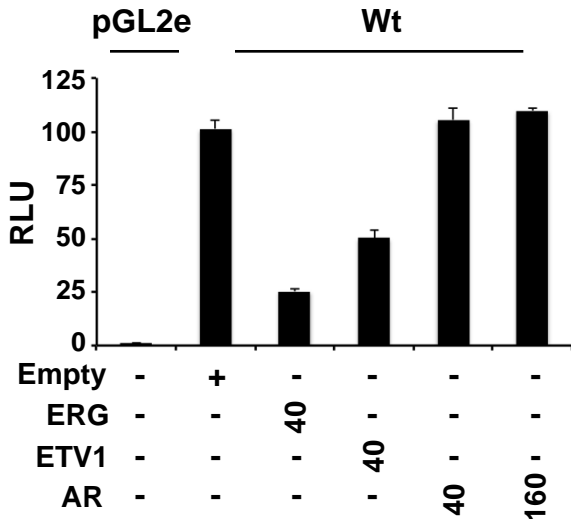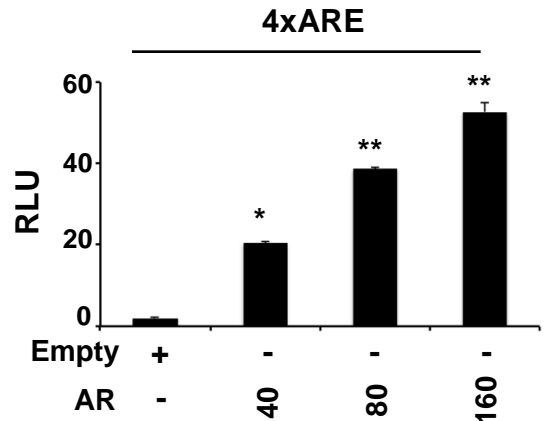

Supplement: NIHMS660781-supplement-4.pdf [file NIHMS660781-supplement-4.pdf]
