# Supplementary material
Source: PubMed Central journal article supplement (PMC6010310)

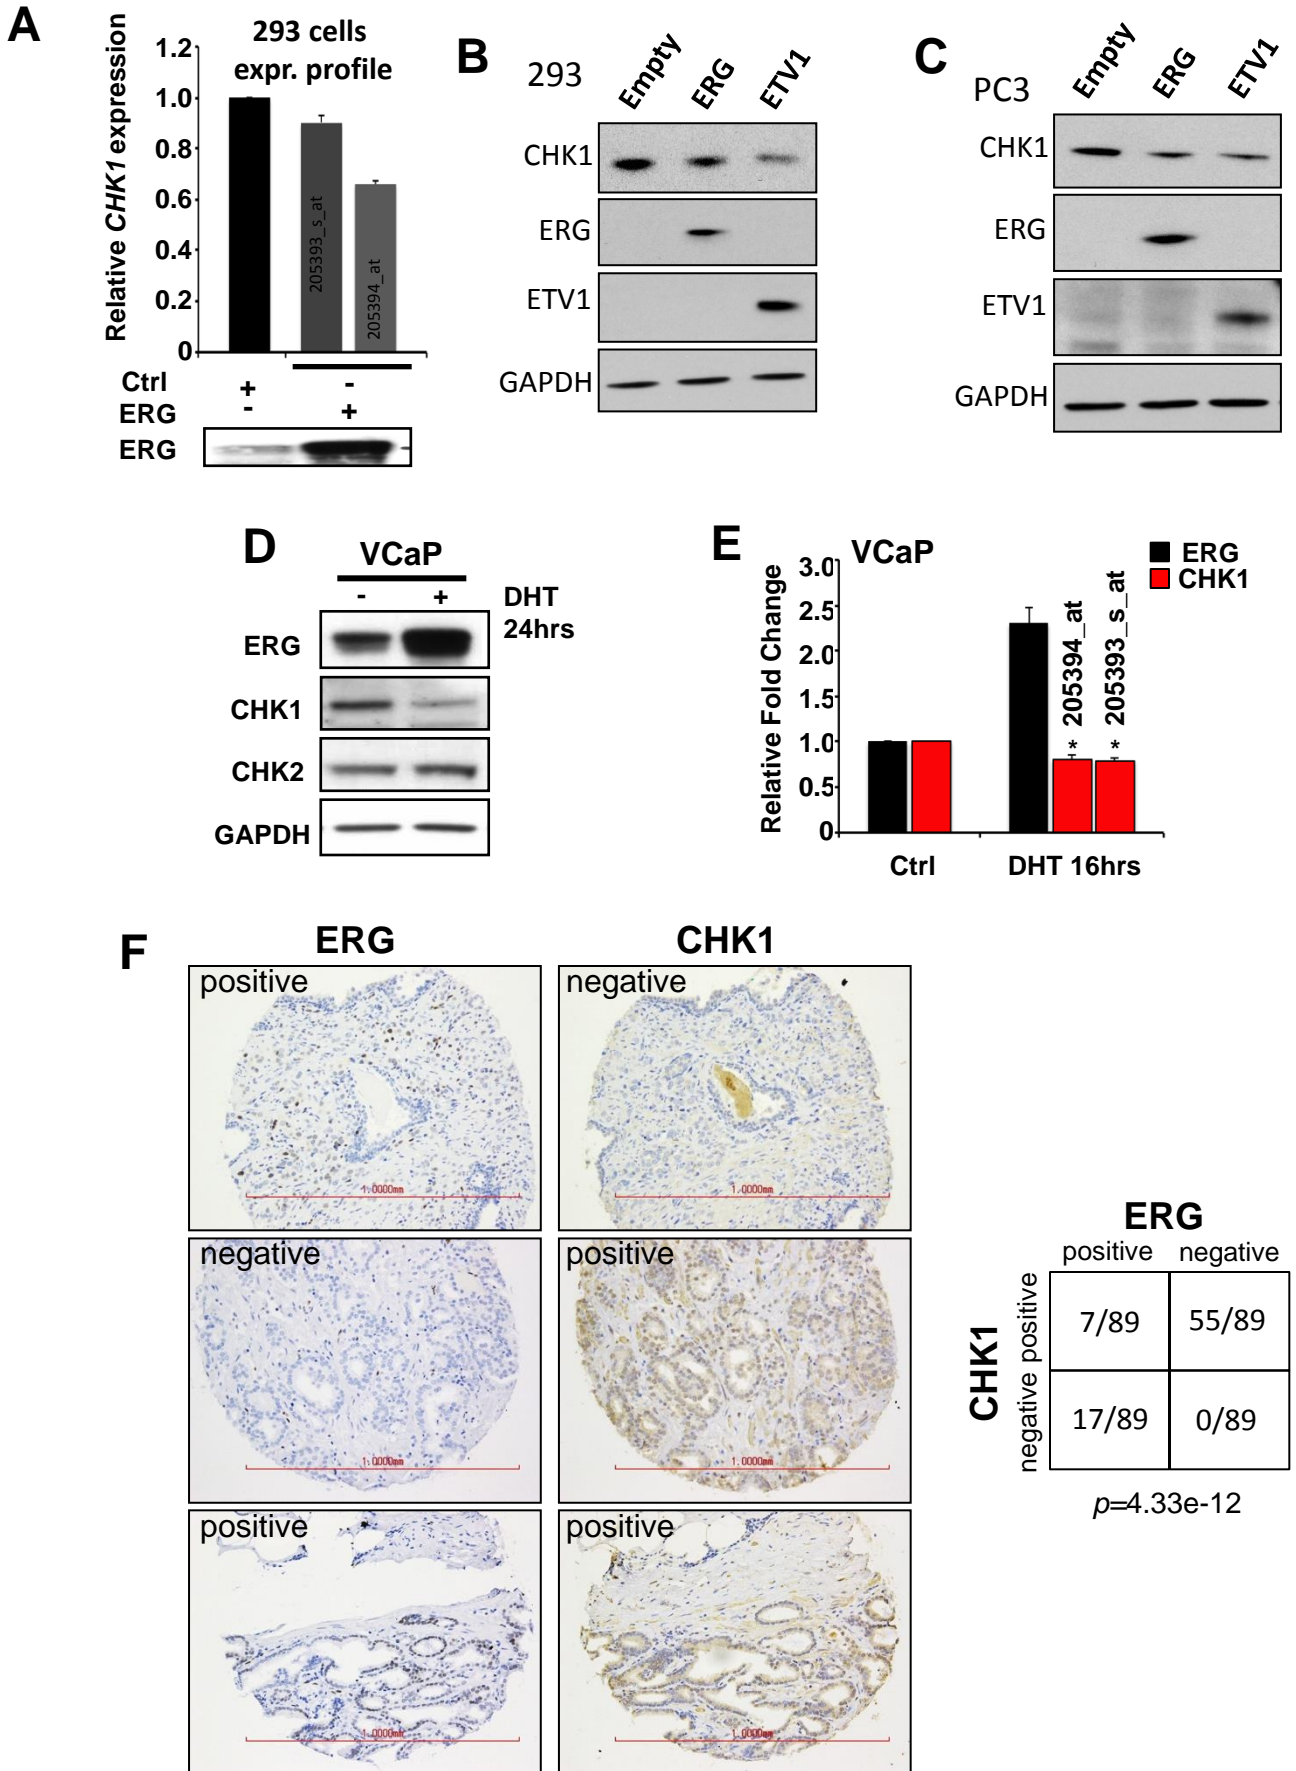

Supplement: NIHMS660781-supplement-2.pdf [file NIHMS660781-supplement-2.pdf]

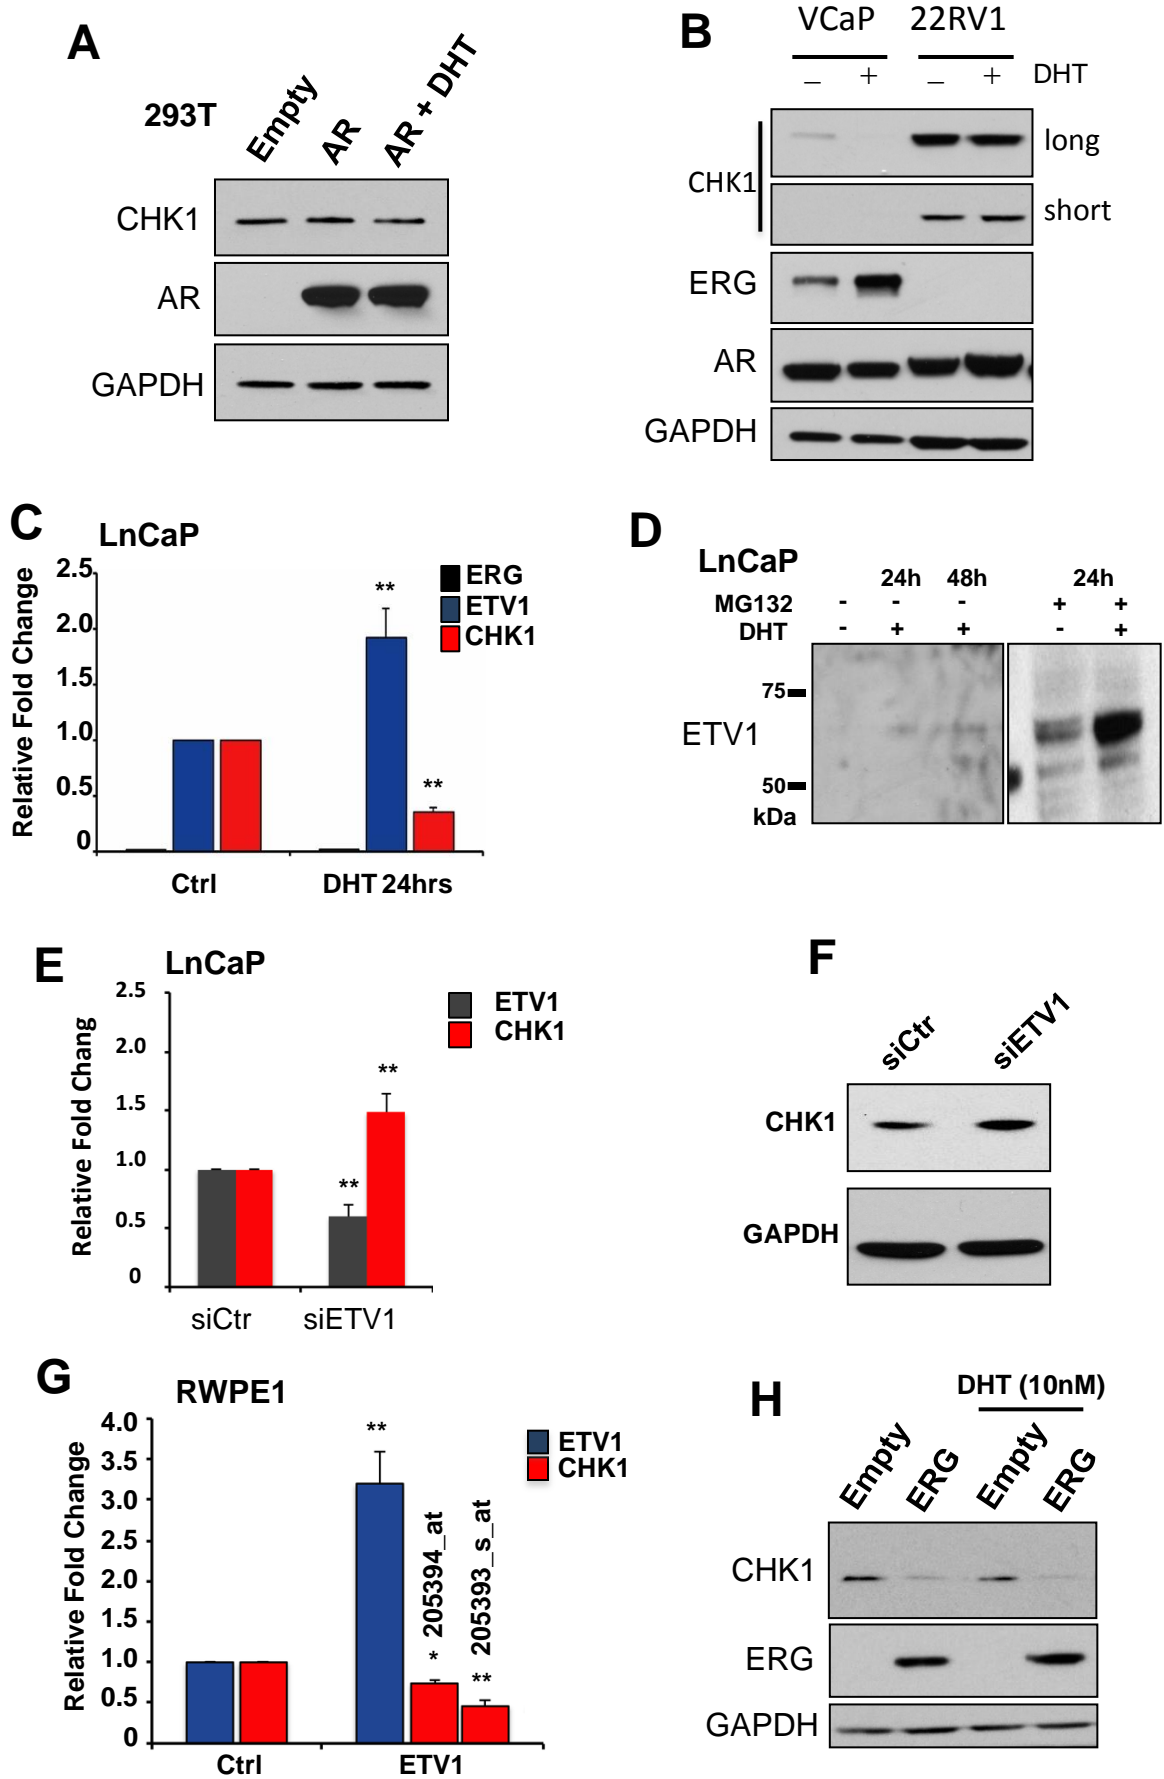

Supplement: NIHMS660781-supplement-3.pdf [file NIHMS660781-supplement-3.pdf]

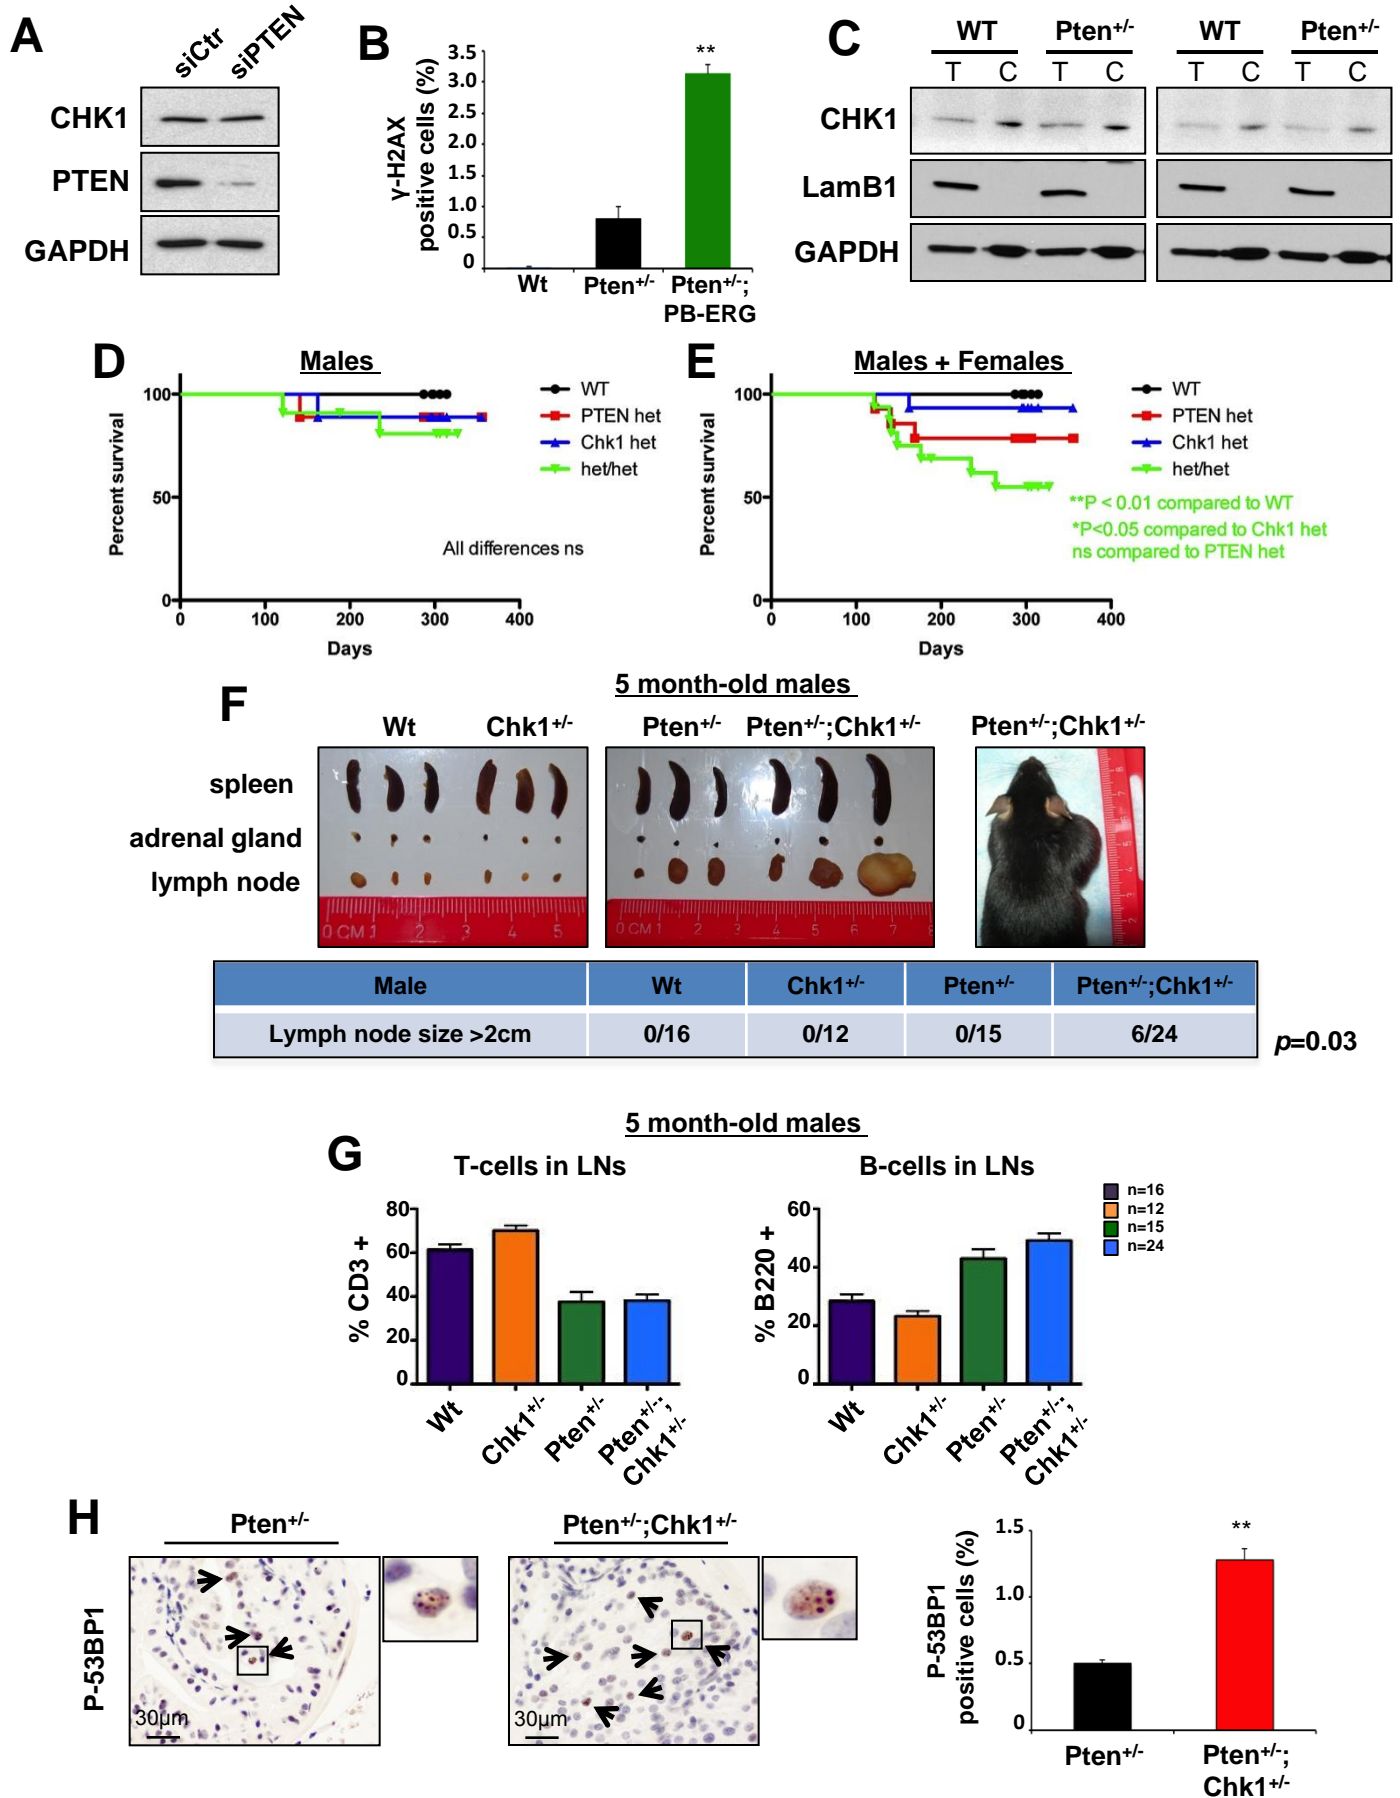

Supplement: NIHMS660781-supplement-5.pdf [file NIHMS660781-supplement-5.pdf]

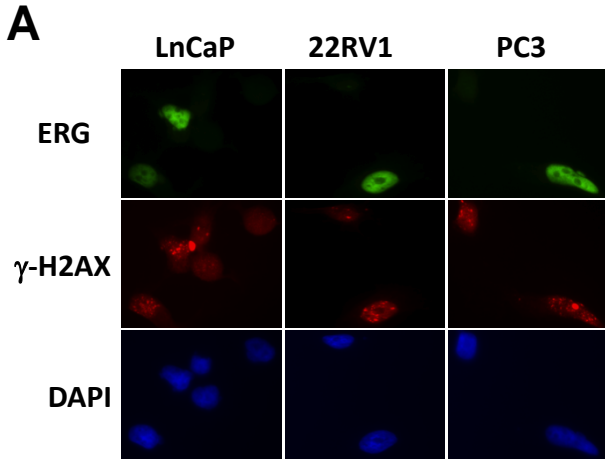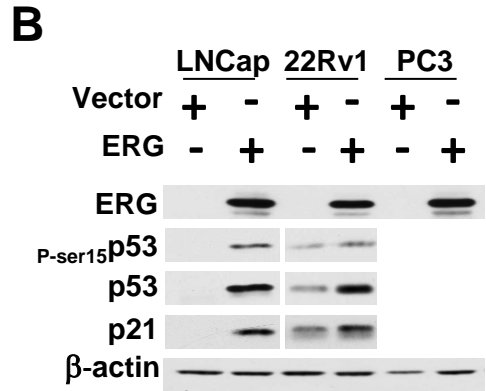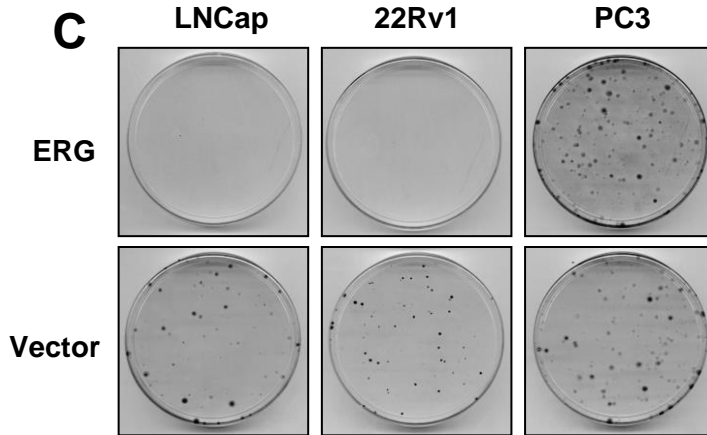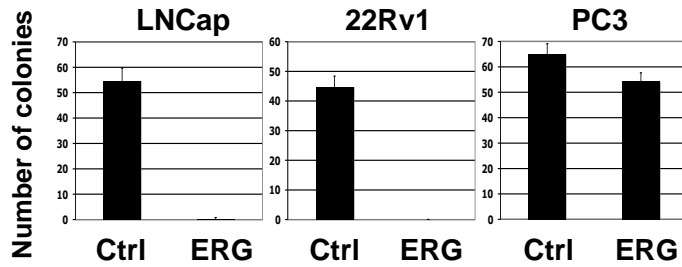

Supplement: NIHMS660781-supplement-6.pdf [file NIHMS660781-supplement-6.pdf]
